# Supplementary material for: Patients’ Post-/Long-COVID Symptoms, Vaccination and Functional Status—Findings from a State-Wide Online Screening Study
Source: MDPI journal article supplement (doi:10.3390/vaccines11030691), 2023-03-17
Supplement: s1 [file s1]

**Table S1** *Descriptives for vaccination status in detail*

|                    | Gender:<br>Female<br>Male                     | Vaccination<br>...<br>Before<br>During<br>After... the<br>infection | Age M (SD)                               | BMI                                       |
|--------------------|-----------------------------------------------|---------------------------------------------------------------------|------------------------------------------|-------------------------------------------|
| No vaccination     | 5 (62.5%)<br>3 (37.5%)                        | -                                                                   | 55.57 (4.47)                             | 29.66 (4.87)                              |
| One<br>vaccination | 4 (80.0%)<br>1 (20.0%)                        | 2 (40.0%)<br>3 (60.0%)<br>0 (0.0%)                                  | 38.20 (17.68)                            | 25.20 (2.34)                              |
| Two<br>vaccination | 30 (68.2%)<br>14 (31.8%)                      | 19 (42.2%)<br>24 (53.3%)<br>2 (4.4%)                                | 43.09 (12.27)                            | 27.18 (5.88)                              |
| ≥ 3 vaccinations   | 88 (73.3%)<br>32 (26.7%)                      | 20 (16.8%)<br>90 (75.6%)<br>9 (7.6%)                                | 44.58 (11.75)                            | 27.11 (5.88)                              |
| No indication      | 34 (77.3%)<br>10 (22.7%)                      | 1 (50%)<br>1 (50%)<br>0 (0.0%)                                      | 44.34 (10.66)                            | 30.00 (12.93)                             |
| <i>Total</i>       | 161 (72.9%)<br>60 (27.1%)                     | 43 (25.0%)<br>118 (68.6%)<br>11 (6.4%)                              | 44.43 (11.77)                            | 27.30 (6.27)                              |
| Statistics         | Chi <sup>2</sup> (4)=1.497;<br><i>p</i> =.827 | Due to too<br>small cell<br>sizes: could<br>not be<br>computed      | <i>F</i> (4,216)=2.11;<br><i>p</i> =.080 | <i>F</i> (4,155)=0.683;<br><i>p</i> =.605 |

*Note.* Varying sample sizes and missings are due to not reported gender, vaccination status, age or BMI.

**Table S2***Descriptives of the repeated measurement ANOVA to examine RQ2*

| Before vs. after/during<br>the vaccination |              | <i>M</i> | <i>SD</i> | <i>N</i> |
|--------------------------------------------|--------------|----------|-----------|----------|
| Symptoms at T1                             | Before       | 2.8429   | 0.60401   | 34       |
|                                            | During/after | 2.6310   | 0.56095   | 103      |
|                                            | Total        | 2.6836   | 0.57704   | 137      |
| Symptoms at T2                             | Before       | 2.3739   | 0.50693   | 34       |
|                                            | During/after | 2.3760   | 0.59945   | 103      |
|                                            | Total        | 2.3755   | 0.57607   | 137      |
| Symptoms at T3                             | Before       | 2.3372   | 0.45909   | 34       |
|                                            | During/after | 2.3218   | 0.60145   | 103      |
|                                            | Total        | 2.3256   | 0.56789   | 137      |

**Table S3***Descriptives of the MANOVA to examine RQ3*

|               |                       |        | <i>M</i> | <i>SD</i> | <i>N</i> |
|---------------|-----------------------|--------|----------|-----------|----------|
| Participation | No vaccination        | female | 4.3902   | 0.03750   | 2        |
|               |                       | male   | 2.8750   | 1.47314   | 2        |
|               |                       | total  | 3.6326   | 1.22028   | 4        |
|               | One vaccination       | female | 3.4375   | 0.92390   | 4        |
|               |                       | male   | 3.6667   | -         | 1        |
|               |                       | total  | 3.4833   | 0.80666   | 5        |
|               | Two vaccination       | female | 3.6107   | 0.54985   | 26       |
|               |                       | male   | 3.4097   | 0.85610   | 12       |
|               |                       | total  | 3.5472   | 0.65661   | 38       |
|               | $\geq 3$ vaccinations | female | 3.2852   | 0.71720   | 75       |
|               |                       | male   | 3.5914   | 0.99124   | 30       |
|               |                       | total  | 3.3727   | 0.81197   | 105      |
|               | No indication         | female | 2.3485   | 0.29742   | 4        |
|               |                       | male   | 3.0625   | 1.45516   | 4        |
|               |                       | total  | 2.7055   | 1.04454   | 8        |
|               | Total                 | female | 3.3531   | 0.71819   | 111      |
|               |                       | male   | 3.4760   | 0.98925   | 49       |
|               |                       | total  | 3.3907   | 0.80963   | 160      |
| Symptoms      | No vaccination        | female | 2.3929   | 0.45457   | 2        |
|               |                       | male   | 2.2500   | 0.35355   | 2        |
|               |                       | total  | 2.3214   | 0.34256   | 4        |
|               | One vaccination       | female | 2.6429   | 0.96362   | 4        |
|               |                       | male   | 1.7143   | -         | 1        |
|               |                       | total  | 2.4571   | 0.93214   | 5        |
|               | Two vaccination       | female | 2.3324   | 0.49112   | 26       |
|               |                       | male   | 2.3819   | 0.65948   | 12       |
|               |                       | total  | 2.3480   | 0.54112   | 38       |
|               | $\geq 3$ vaccinations | female | 2.3820   | 0.54080   | 75       |
|               |                       | male   | 2.3452   | 0.59617   | 30       |
|               |                       | total  | 2.3715   | 0.55451   | 105      |
|               | No indication         | female | 2.5893   | 0.68852   | 4        |
|               |                       | male   | 1.9643   | 0.48269   | 4        |
|               |                       | total  | 2.2768   | 0.64392   | 8        |
|               | Total                 | female | 2.3874   | 0.54432   | 111      |
|               |                       | male   | 2.3063   | 0.59255   | 49       |
|               |                       | total  | 2.3626   | 0.55891   | 160      |

|                   |                  |        |        |         |     |
|-------------------|------------------|--------|--------|---------|-----|
| Workability       | No vaccination   | female | 8.50   | 0.707   | 2   |
|                   |                  | male   | 9.00   | 1.414   | 2   |
|                   |                  | total  | 8.75   | 0.957   | 4   |
|                   | One vaccination  | female | 5.50   | 3.109   | 4   |
|                   |                  | male   | 3.00   | -       | 1   |
|                   |                  | total  | 5.00   | 2.915   | 5   |
|                   | Two vaccination  | female | 6.00   | 2.040   | 26  |
|                   |                  | male   | 4.83   | 2.082   | 12  |
|                   |                  | total  | 5.63   | 2.098   | 38  |
|                   | ≥ 3 vaccinations | female | 4.79   | 2.321   | 75  |
|                   |                  | male   | 4.57   | 2.029   | 30  |
|                   |                  | total  | 4.72   | 2.234   | 105 |
|                   | No indication    | female | 2.50   | 1.732   | 4   |
|                   |                  | male   | 7.25   | 2.363   | 4   |
|                   |                  | total  | 4.87   | 3.182   | 8   |
|                   | Total            | female | 5.08   | 2.375   | 111 |
|                   |                  | male   | 5.00   | 2.273   | 49  |
|                   |                  | total  | 5.06   | 2.337   | 160 |
| Life satisfaction | No vaccination   | female | 2.7500 | 0.70711 | 2   |
|                   |                  | male   | 2.7500 | 1.41421 | 2   |
|                   |                  | total  | 2.7500 | 0.91287 | 4   |
|                   | One vaccination  | female | 2.5000 | 0.40825 | 4   |
|                   |                  | male   | 2.7500 | -       | 1   |
|                   |                  | total  | 2.5500 | 0.37081 | 5   |
|                   | Two vaccination  | female | 2.4872 | 0.44826 | 26  |
|                   |                  | male   | 2.2917 | 0.59193 | 12  |
|                   |                  | total  | 2.4254 | 0.49842 | 38  |
|                   | ≥ 3 vaccinations | female | 2.0544 | 0.58598 | 75  |
|                   |                  | male   | 2.1250 | 0.75358 | 30  |
|                   |                  | total  | 2.0746 | 0.63538 | 105 |
|                   | No indication    | female | 1.6875 | 0.47324 | 4   |
|                   |                  | male   | 1.8125 | 0.55434 | 4   |
|                   |                  | total  | 1.7500 | 0.48181 | 8   |
|                   | Total            | female | 2.1712 | 0.58591 | 111 |
|                   |                  | male   | 2.1786 | 0.72169 | 49  |
|                   |                  | total  | 2.1734 | 0.62828 | 160 |

*Note.* – indicates that no SD could be computed.
